# Supplementary material for: Asy2/Mer2: an evolutionarily conserved mediator of meiotic recombination, pairing, and global chromosome compaction
Source: PubMed Central journal article supplement — Genes Dev. 2017 Sep 15;31(18):1880–93. doi: 10.1101/gad.304543.117 (PMC5695089; doi:10.1101/gad.304543.117), 2017-09-15
Supplement: supp_gad.304543.117_Supplemental_304543_Table_S1.pdf [file supp_gad.304543.117_Supplemental_304543_Table_S1.pdf]

| gene          | gene nomenclature | primer name  | sequence                  |
|---------------|-------------------|--------------|---------------------------|
| <i>AS1</i>    | SMAC_00248        | AS1f-SM      | ggctgacgaatac/aacgccg     |
|               |                   | AS1r-SM      | ccaaggtcgaggaga/gcatc     |
| <i>CIT1</i>   | SMAC_02401        | CIT1f-SM     | ctactctccaagactcag/actc   |
|               |                   | CIT1r-SM     | cgatcttggaaccgtgctc/cttg  |
| <i>GPD</i>    | SMAC_06203        | GPDE1E2      | cattgagcccaagtacgt/ga     |
|               |                   | GPDE2reverse | gtcgcgctcagtgtagaactga    |
| <i>H2A</i>    | SMAC_08324        | H2Af-SM      | ccaagaacgcgcaatc/ccgc     |
|               |                   | H2Ar-SM      | gcccgcaagctcgagaatttcg    |
| <i>PDF2</i>   | SMAC_01919        | PDF2f_Sm     | cacttgctttgctatcacg/acc   |
|               |                   | PDF2r_Sm     | gaaggcgacgaagaacac        |
| <i>TBP</i>    | SMAC_03405        | TBPf-SM      | catgaccctactctacag/aacatc |
|               |                   | TBPr-SM      | gcaaaacgcttggggtata/ctcg  |
| <i>TIP42</i>  | SMAC_08092        | TIPf_Sm      | gtttgagaatgtgaagacg/aaac  |
|               |                   | TIPr_Sm      | cttgataagcggcagcaga       |
| <i>UBC</i>    | SMAC_07925        | UBCf_Sm      | gatggtcttgccagtc/aagt     |
|               |                   | UBCr_Sm      | tccatcaacggtcattcg        |
| <i>ASY2</i>   | SMAC_02785        | E1ASY2       | gcctcttatcgaagcag/cgc     |
|               |                   | E2ASY2       | cgcttcgggttcgctcttt       |
| <i>SPO11</i>  | SMAC_03194        | SPO11f3      | cgctcattgagaaggag/gcc     |
|               |                   | SPO11r3      | cgggatatccttttcc/agt      |
| <i>REC114</i> | SMAC_06317        | 6317f1       | gacaaagcagatgagctg/gtg    |
|               |                   | 6317r1       | cgagaacaaaagtgacgc/cct    |
