# Supplementary material for: Asy2/Mer2: an evolutionarily conserved mediator of meiotic recombination, pairing, and global chromosome compaction
Source: PubMed Central journal article supplement — Genes Dev. 2017 Sep 15;31(18):1880–93. doi: 10.1101/gad.304543.117 (PMC5695089; doi:10.1101/gad.304543.117), 2017-09-15
Supplement: supp_gad.304543.117_Supplemental_304543_Table_S3.pdf [file supp_gad.304543.117_Supplemental_304543_Table_S3.pdf]

| primer name    | sequence                           |
|----------------|------------------------------------|
| Eco_rad51      | ggatgaattcatgtcgaacaacgaggagtacg   |
| Bam_rad51      | cttggatcctattgccccatcttctccatc     |
| Eco_ski8       | acaggaattcatgtcgaacaatacctaaccctc  |
| Bam_ski8       | tgtggatcctatgaccagtagcctccc        |
| Eco_spp1       | tctgaattcatggcctcctcgttttcaaac     |
| Pst_spp1       | atactgcagttactggccacccatctcc       |
| Eco_asy2       | atgagaattcatggcttcggcatcgcgattg    |
| Bam_asy2       | caaggatcctacacctcagcaagcgccgt      |
| Bam_asy2(286)  | acaggatccctacgtgcttcgataagaggcacg  |
| Eco_asy2(287)  | actgaattcccccaactcgatctgccatgg     |
| W_ASY2-17      | cctctcatcgccttgggataagtcatcc       |
| C_ASY2-17      | ggatgaacttatcccaagggcgatgagagg     |
| Asy2mutsu19    | caagctctcgagcccgaagacggatcttg      |
| Asy2mutsu19rev | caagatccgtcttcgggctcgagagcttg      |
| Bam_asy2 (156) | cgtggatccctaactttctagtgcggagatccgg |
| Eco_asy2 (157) | ctagaattcgatgtcaggcagaacaaggaacaag |
| Eco_6317       | aggaattcatggcgtcctcgaagagcac       |
| Sal-6317       | agtcgacagcccgagtgtctcaacaag        |
